# Supplementary material
Source: PubMed Central journal article supplement (PMC3260372)
Supplement: NIHMS324355-supplement.pdf [file NIHMS324355-supplement.pdf]

**Supplemental Table 1. Tissue content of dopamine (DA) and its major metabolite 3,4-dihydroxyphenylacetic acid (DOPAC).** Concentrations are given in pg per mg of tissue.

|                    | Anterior-dorsal Caudate-Putamen |              | Substantia Nigra (compacta& reticulata) |             | Ventral Tegmental Area |       | Anterior ventral thalamus |       | Parietal motor cortex |       | Ventroposterior lateral thalamus |       |
|--------------------|---------------------------------|--------------|-----------------------------------------|-------------|------------------------|-------|---------------------------|-------|-----------------------|-------|----------------------------------|-------|
| Genotype           | DA                              | DOPAC        | DA                                      | DOPAC       | DA                     | DOPAC | DA                        | DOPAC | DA                    | DOPAC | DA                               | DOPAC |
| Gβ5 <sup>+/+</sup> | 226.00 ± 24.74                  | 19.29 ± 8.81 | 4.52 ± 0.77                             | 0.43 ± 0.43 | 18.46 ± 1.99           | nd    | 0.79 ± 0.10               | nd    | 1.80 ± 1.47           | nd    | 0.65 ± 0.05                      | nd    |
| Gβ5 <sup>-/-</sup> | 210.78 ± 8.02                   | 4.55 ± 0.55  | 4.67 ± 0.76                             | 1.73 ± 0.67 | 22.85 ± 1.78           | nd    | 0.56 ± 0.19               | nd    | 1.15 ± 0.53           | nd    | 0.72 ± 0.20                      | nd    |
